1 **Anemia and associated factors among 6-59 months age**  
2 **children attending health facilities in Northeast Ethiopia: A**  
3 **facility based cross sectional study**

4 Wubshet Fentaw<sup>1</sup>, Tefera Belachew<sup>2</sup>, Assefa Andargie<sup>1\*</sup>

5 <sup>1</sup>School of Public Health, College of Medicine and Health Sciences, Wollo University, Dessie,  
6 Ethiopia

7 <sup>2</sup>Department of Nutrition and Dietetics, Faculty of Public Health, Institute of Health, Jimma  
8 University, Jimma, Ethiopia

9 \* Corresponding author

10 E-mail: [assefaand@gmail.com](mailto:assefaand@gmail.com)

11

12

13

14

15

16

17

18

19

## 20 **Abstract**

21 **Background:** In the early stages of life, anemia leads to severe negative consequences on the  
22 cognitive, growth and development of children. The Ethiopian demographic and health survey  
23 showed an increasing trend of anemia nationally.

24 **Objective:** The aim of this study is to assess the magnitude and factors associated with anemia  
25 among under-five children.

26 **Methods:** A health facility based cross sectional study was conducted among 409 systematically  
27 selected children 6-59 months attending services at public and private health institutions in  
28 Kombolcha Town, Northeast Ethiopia. Data were collected using structured questioner from  
29 mother or caretakers. The data entry and analysis were done by SPSS version 20. Binary logistic  
30 regression was fitted to determine associations. The odds ratio with the 95% confidence intervals  
31 were reported.

32 **Results:** From the total participant 213(53.9%) were males with the mean age of 26 months  
33 (SD±15.2). The overall prevalence of anemia was 52.2% (95% CI, 46.8%-57%). Being in the age  
34 of 6-11 months (AOR= 6.23, 95% CI: 2.44, 15.95), 12-23 months (AOR= 3.74, 95%CI: 1.63,  
35 8.60), maternal age  $\geq 30$  years (AOR=0.37 (0.18, 0.77), exclusive breast feeding until six months  
36 (AOR=0.27, 95% CI: 0.16, 0.45), having low dietary diversity score (AOR=2.61, 95% CI: 1.55,  
37 4.38), having history of diarrhea (AOR= 1.87, 95% CI: 1.12, 3.12) and having the lowest family  
38 monthly income (AOR=16.97, 95% CI: 4.95, 58.20) were identified as factors associated with  
39 anemia.

40 **Conclusion:** The magnitude of anemia in children was a public health problem in the study area.  
41 child age, maternal age, exclusive breastfeeding, dietary diversity score, diarrhea and family  
42 income were found to be associated with anemia.

## 43 **Introduction**

44 Anemia is a major health problem throughout the world. The magnitude of the problem in  
45 developing countries is high since they were more exposed to various health and socioeconomic  
46 problems, which are directly or indirectly related with anemia [1]. Though all age groups can  
47 develop anemia due to various factors, under-five children are among the most vulnerable age  
48 groups [2]. According to the World Health organization (WHO) 2015 report 43% of under five  
49 children were anemic, with regional variations of 62.3% in African, 53.8% in South-East Asia and  
50 21.9% in Western Pacific Region [3]. In East Africa, approximately 75 % of under-five children  
51 have anemia with the prevalence's ranging between 44 and 76 % [4]. It was estimated that 57% of  
52 children under five years in Ethiopia had anemia [5].

53 Anemia among under five-children is a condition, which has serious consequences including  
54 growth retardation, poor immune system and increased susceptibility to diseases and death and has  
55 severe socio-economic consequences for families and communities [6–9]. It creates long-term  
56 effect among female children resulting in low-birth-weight babies and postpartum hemorrhage  
57 especially young children from low-income families have a higher risk for developing iron  
58 deficiency anemia [10].

59 In developing countries, insufficient dietary iron is considered as the primary cause of anemia in  
60 children [7,9,10]. Other factors like parasitic infections, maternal age, maternal educational status,  
61 maternal marital status, Ante Natal Care (ANC) visit, child's place of birth, frequency of

62 complementary feeding per day, loss of appetite, breastfeeding status, and family monthly income  
63 have significant effect in the differentials of anemia occurrence [5,11,20,12–19].

64 Several studies has been conducted across different parts of Ethiopia on childhood anemia  
65 [12,13,15,17,20–23]. However, there is scarcity of evidence on childhood anemia in the  
66 Northeastern part of the country where drought and food insecurity are rampant in the area.  
67 Therefore, this study was conducted to determine the prevalence and factors associated with  
68 anemia among under five children visiting health facilities in Kombolcha town, located in the  
69 Northeastern part of the country under the Amhara regional state.

## 70 **Materials and methods**

### 71 **Study design and population**

72 This study employed a facility based cross-sectional design in Northeast Ethiopia (Kombolcha  
73 town). The study population was all under-five years children who visited selected public and  
74 private health facilities for any services in the town during the study period.

### 75 **Study Area and period**

76 The study was conducted in Kombolcha town located in the North-eastern part of Ethiopia in  
77 Amhara Regional State, South Wollo zone at a distance of 378 km from the capital Addis Ababa  
78 to the Northeast. The town is an important commercial and industrial center in the northeast  
79 Ethiopia. The study was conducted from February 1 to April 30, 2020.

## 80 **Eligibility criteria**

81 All children who have been living above 6 months in the area and their age 6 to 59 months who  
82 visited the selected health institutions were included in this study. Whereas, children with known  
83 bleeding disorder, severe illness, mentally ill mother (care taker), and children who have taken  
84 blood and blood products (blood transfused) for the last 3 months were excluded from the study.

## 85 **Sample size and sampling procedure**

86 The sample size was determined based on the single population assumption taking the prevalence  
87 of anemia to be 41.1% with 5 % margin of error and 95% confidence level [12]. By considering  
88 10% non-response rate the final sample size was estimated to be 409. The list of health institutions  
89 was obtained from the town administration health office and were stratified into public and private.  
90 Then, half of the public and one-third of the private institutions were selected using simple random  
91 sampling technique (lottery method). The study subjects were selected using systematic sampling  
92 method.

## 93 **Outcome measurement**

94 **Anemia**, in under five children, was defined as hemoglobin level below 11g/dl. In this study, the  
95 Hgb level was adjusted to altitude. Since the study area is found 1842m above sea level, 0.8 g/dl  
96 was added to the standard Hgb cut-off value. Therefore, children with Hgb of 11.8g/dl or more  
97 were considered as normal while children who had Hgb value <11.8 g/dl were considered as  
98 anemic [5].

## 99 **Data collection procedures**

100 Pretested and structured questionnaire was used to collect socioeconomic and demographic  
101 characteristics of the family, breast feeding status and dietary diversity of the child and other risk  
102 factors by interviewing mother/caregivers of the child. The questionnaire was adapted from  
103 previous similar literatures and prepared in English, translated in to the local language, and then  
104 back to English to ensure its consistency. Six trained nurses and six laboratory technicians  
105 conducted the data collection.

## 106 **Blood specimen collection and examination**

107 After asking the willingness of parents/care givers, a capillary blood samples were collected from  
108 children under strict aseptic precautions by the trained laboratory technicians. The hemoglobin  
109 concentration was measured using HemoCue Hb 201 analyzer.

## 110 **Stool specimen collection and examination**

111 A clean plastic container marked with an identification number was used to collect about 2 mg of  
112 stool sample from each child. Then, stool wet mount smear was prepared using saline and/or iodine  
113 solution for direct microscopic identification of intestinal parasites within 30 minutes of sample  
114 collection. The direct smear was examined first by 10x and then 40x objective for detection of  
115 helminths eggs, larvae and protozoan parasites by experienced medical laboratory technicians.

## 116 **Data quality control**

117 The quality of data was assured through careful designing, translation, pre-testing of the  
118 questionnaire and training of data collectors. Every day after data collection, the filled  
119 questionnaire was checked for completeness by the principal investigator, supervisors, and

120 correction made accordingly for the next day. Standard operating procedures (SOPs) and  
121 manufacturers' instruction was strictly followed for all laboratory activities. All laboratory  
122 reagents were checked for their expiry date. Samples were checked whether they are in the  
123 acceptable criteria like-volume, consistency and collection time. Microscopic slides and cover  
124 glasses were checked for cleanliness.

## 125 **Data processing and analysis**

126 The collected data were entered in to Epidata version 3.1 and exported to SPSS version 26.0 for  
127 analysis. Descriptive statistics like frequencies, proportions and summary measures were  
128 computed. Binary logistic regression was employed to identify factors associated with anemia.  
129 First bivariate binary logistic regression was performed and variables found to be significant at P-  
130 value  $<0.25$  were imputed into multiple logistic regression. A p-value  $< 0.05$  was used to indicate  
131 statistical significance in the multiple logistic regression model. Both the crude and adjusted Odds  
132 Ratio were reported as effect measures. The results were presented using tables, figures and text  
133 narratives.

## 134 **Results**

### 135 **Characteristics of study participants**

136 Out of 409 participants 395 participants responded correctly making the response rate of 96.6%.  
137 The rest participants were refusals. About 213(53.9%) were males with the mean age of 26 months  
138 (SD $\pm$ 15.2). From the total of mothers interviewed, 211 (53.4%) were attended secondary education  
139 and above; and about 330 (83.5%) were from urban residence. Regarding the marital status of  
140 mothers, 357 (90.3%) were married (Table 1).

141 **Table 1: Socio-demographic characteristics of children under-five years attending health**  
 142 **institutions of Kombolcha town, Northeast Ethiopia (n=395).**

| <b>Variables</b> | <b>Category</b> | <b>Frequencies</b> | <b>Percent</b> |
|------------------|-----------------|--------------------|----------------|
| Child Sex        | Male            | 213                | 53.9           |
|                  | Female          | 182                | 46.1           |
| Child age        | 6-11            | 72                 | 18.2           |
|                  | 12-23           | 128                | 32.4           |
|                  | 24-35           | 80                 | 20.3           |
|                  | 36-47           | 57                 | 14.4           |
|                  | 48-59           | 58                 | 14.7           |
| Residence        | Urban           | 330                | 83.5           |
|                  | Rural           | 65                 | 16.5           |
| Religion         | Orthodox        | 124                | 31.4           |
|                  | Muslim          | 265                | 67.1           |
|                  | Protestant      | 6                  | 1.5            |
| Maternal age     | 18-27           | 219                | 55.4           |
|                  | 28-38           | 168                | 42             |
|                  | >39             | 8                  | 2              |
| Marital status   | Single          | 29                 | 7.3            |
|                  | Married         | 357                | 90.4           |
|                  | Divorced        | 7                  | 1.8            |
| Ethnicity        | Amhara          | 374                | 94.7           |



|                               |                     |     |      |
|-------------------------------|---------------------|-----|------|
|                               | Tigre               | 17  | 4.3  |
|                               | Other               | 4   | 1    |
| Educational status of mothers | No formal education | 37  | 9.4  |
|                               | Primary education   | 147 | 37.2 |
|                               | Secondary and above | 211 | 53.4 |
| Mothers' occupation           | House wife          | 304 | 77   |
|                               | Employed            | 81  | 20.5 |
|                               | Student             | 9   | 2.3  |
| Monthly family income (ETB)   | <1500               | 62  | 15.7 |
|                               | 1501-3000           | 67  | 17   |
|                               | 3001-4500           | 201 | 50.9 |
|                               | >4500               | 65  | 16.5 |
| Family size                   | <4                  | 158 | 40   |
|                               | 4 and above         | 237 | 60   |

143 **Abbreviations:** ETB, Ethiopian Birr

## 144 **Nutrition and disease morbidities**

145 Out of 395 study subjects, 171 (43.3%) had diarrhea from which 102 (49.8%) were anemic. Most  
 146 of 256 (64.2%) of children got adequate dietary diversity score (four and more food groups) per  
 147 24 hours out of them 104 (40.6) were anemic (Table 2).

148 **Table 2: Characteristics related to nutrition and morbidity among children under-five years**  
 149 **attending health facilities in Kombolcha town, Northeast Ethiopia (n=395).**

| Variables                          | Category | Frequencies | Percent |
|------------------------------------|----------|-------------|---------|
| History of malaria in children     | Yes      | 14          | 3.5     |
|                                    | No       | 381         | 96.5    |
| History of TB                      | Yes      | 2           | 0.5     |
|                                    | No       | 393         | 99.5    |
| Vitamin A supplement and deworming | Yes      | 146         | 37      |
|                                    | No       | 249         | 63      |
| Diarrhea in children               | Yes      | 171         | 43.3    |
|                                    | No       | 224         | 56.7    |
| Exclusive breast feeding           | Yes      | 173         | 43.7    |
|                                    | No       | 222         | 56.2    |
| Dietary diversity score            | Low      | 139         | 35.2    |
|                                    | Adequate | 256         | 64.8    |

150 **Abbreviation:** TB, Tuberculosis

### 151 **Anemia among children**

152 The mean hemoglobin value of children was 11.4 g/dl (SD ±18.3). From all children 206 (52.2%;  
 153 95% CI 46.8-57.0) were anemic, of which 114 (55.3%) were males (Fig 1).

154 **Fig 1: Proportion of anemia aggregated by child sex.**

## 155 **Factors associated with anemia**

156 Children in the age group of 6-11 months were six times more likely to have anemia as compared  
 157 to 48-59 months (AOR: 6.23, 95% CI: 2.44, 15.95). Similarly, children 12-23 months of age were  
 158 3.74 times as likely to be anemic than 48-59 months children (AOR: 3.74, 95% CI: 1.63, 8.60).  
 159 Children from mothers of at least 30 years old were 63% less likely to be anemic as compared to  
 160 children from younger mothers (AOR: 0.37, 95% CI: 0.18, 0.77). Children who exclusively breast  
 161 fed up to six months were 73% less likely to be anemic compared to children who were not  
 162 exclusively breast fed (AOR: 0.27, 95% CI: 0.16, 0.45). Children having low dietary diversity  
 163 score were 2.6 times more likely to have anemia than those having adequate DDS (AOR: 2.61,  
 164 95% CI: 1.55, 4.38). Children who have history of diarrhea in the past 2 months prior to the data  
 165 collection were nearly 2 times more likely to be anemic than children who do not have history of  
 166 diarrhea (AOR: 1.87, 95% CI: 1.12, 3.12). Children from households with Family monthly income  
 167 of <1,500 ETB were 17 times more likely to have anemia as compared to those who had family  
 168 income of >4,500 ETB (AOR: 16.97, 95%CI: 4.95, 58.20) (Table 3).

169 **Table 3: Factors associated with anemia among children 6-59 months in Kombolcha town,**  
 170 **Northeast Ethiopia (n=395).**

| Factors                     |       | Anemia |    | COR              | AOR                | P-value |
|-----------------------------|-------|--------|----|------------------|--------------------|---------|
|                             |       | Yes    | No | (95% CI)         | (95% CI)           |         |
| Age of Children (in months) | 6-11  | 51     | 21 | 6.38 (2.9, 13.7) | 6.23 (2.44, 15.95) | <0.001  |
|                             | 12-23 | 76     | 52 | 3.84 (1.9, 7.5)  | 3.74 (1.63, 8.60)  | 0.002   |
|                             | 24-35 | 36     | 44 | 2.14 (1.04, 4.4) | 2.31 (0.94, 5.68)  | 0.067   |
|                             | 36-47 | 27     | 30 | 2.36(1.08, 5.1)  | 2.44 (0.93, 6.44)  | 0.071   |

|                               |             |     |     |                   |                     |                  |
|-------------------------------|-------------|-----|-----|-------------------|---------------------|------------------|
|                               | 48-59       | 16  | 42  | 1.00              | 1.00                |                  |
| Residence                     | Urban       | 159 | 171 | 1.00              | 1.00                |                  |
|                               | Rural       | 47  | 18  | 2.81 (1.57, 5.04) | 1.89 (0.85, 4.20)   | 0.119            |
| Maternal age (in years)       | <30         | 182 | 146 | 1.00              | 1.00                |                  |
|                               | >=30        | 24  | 43  | 0.45 (0.26, 0.77) | 0.37 (0.18, 0.77)   | <b>0.008</b>     |
| EBF                           | No          | 147 | 75  | 1.00              | 1.00                |                  |
|                               | Yes         | 59  | 114 | 0.26 (0.17, 0.40) | 0.27 (0.16, 0.45)   | <b>&lt;0.001</b> |
| DDS                           | Low         | 134 | 59  | 4.10 (2.69, 6.24) | 2.61 (1.55, 4.38)   | <b>&lt;0.001</b> |
|                               | Adequate    | 72  | 130 | 1.00              | 1.00                |                  |
| Diarrhea in the last 2 months | No          | 104 | 120 | 1.00              | 1.00                |                  |
|                               | Yes         | 102 | 69  | 1.71 (1.14, 2.55) | 1.87 (1.12, 3.12)   | <b>0.017</b>     |
| Monthly income (ETB)          | <1,500      | 58  | 4   | 18 (5.8, 55.4)    | 16.97 (4.95, 58.20) | <b>&lt;0.001</b> |
|                               | 1,501-3,000 | 43  | 24  | 2.2 (1.1, 4.4)    | 1.61 (0.67, 3.87)   | 0.283            |
|                               | 3,001-4,500 | 76  | 125 | 0.75 (0.4, 1.3)   | 0.64 (0.33, 1.25)   | 0.190            |
|                               | >4,500      | 29  | 36  | 1.00              | 1.00                |                  |

171 **Abbreviations:** AOR, Adjusted Odds Ratio; CI, Confidence Interval; COR, Crude Odds Ratio;

172 DDS, Dietary Diversity Score; EBF, Exclusive Breast Feeding; ETB, Ethiopian Birr

## 173 Discussion

174 This study was conducted to determine the prevalence of anemia and associated factors among  
 175 children 6-59 months in northeast Ethiopia. The magnitude of anemia was found to be 52.2%,  
 176 which is considered severe public health problem as of the WHO severity classification of anemia  
 177 that sets 40% as a threshold [24]. This finding is comparable with findings in Southern Ethiopia

178 [25] and Brazil [26]. But it is higher than findings from Gugufu (Northeast Ethiopia) [12], Gondar  
179 (Northwest Ethiopia) [17] and Hawassa (Southern Ethiopia) [15]. This discrepancy may be  
180 justified by the fact that the area, where this study was conducted, is frequently affected by drought  
181 so that there might be food scarcity. However, this finding is lower than findings from Bedele  
182 Hospital (Southwest Ethiopia) [27], Tanzania [28], and Ghana [29]. In addition, the current  
183 prevalence of anemia is lower than the national anemia prevalence in children under-five years  
184 age [5]. This might be attributed to the fact that the majority of the participants in the current study  
185 area consume relatively high animal-based foods, which is rich in hem iron with good  
186 bioavailability.

187 Younger children were at a higher risk of anemia than older children. This finding is supported by  
188 studies in Gugufu (Northeast Ethiopia) [12], Gondar town (Northwest Ethiopia) [17], Adami  
189 Tullu (South Central Ethiopia) [30], Hawassa (Southern Ethiopia) [15] and Tanzania [28]. In fact,  
190 infants began to eat complementary foods after six months old. From this time onwards up to 2  
191 years there might be difficulty in ingesting such complementary feed and may result in deficiency  
192 of nutrients leading to higher probability of anemia. In contrary, children would have ability of  
193 eating variety of foods when they become older.

194 Age of mother was significantly associated with anemia. Children born from older mothers were  
195 less likely to be anemic compared to children from younger mothers. This is in line with a study  
196 in Ghana [19]. As the maternal age increases, the mother probably will have more children so that  
197 a better experience on child care and feeding. The better the care and feeding practice a child get,  
198 the lesser risk of malnutrition.

199 Whether a child was exclusively breast fed or not also matters the occurrence of childhood anemia.  
200 Children who exclusively breastfed until six months were less likely to be anemic than their  
201 counter parts. This finding contradicted with a study in china [31]. This discrepancy may be  
202 explained by the socio-economic differences in the study participants and study design. Exclusive  
203 breastfeeding for the first six months is a highly recommended feeding practice by the WHO. It  
204 provides the optimal feeding option by preventing diarrheal diseases, respiratory tract infections  
205 and chronic diseases [32]. This may help exclusively breastfed children to be at a lower risk of  
206 anemia.

207 The dietary diversity score of a child was associated with anemia. Children who had low dietary  
208 diversity score were more likely to be anemic than children who had adequate dietary diversity  
209 score. This finding is similar to study done in Hohoe Municipality, Ghana [33]. However, there  
210 was no significant association between DDS and anemia among studies conducted in Menz Gera  
211 (Central Ethiopia) [34], Kilde Awulaelo (Northern Ethiopia) [20]. In fact, eating variety of foods  
212 may provide all the necessary nutrients, prevent disease and boost immunity of the child. Hence,  
213 a child with adequate dietary diversity score may have a low risk of anemia.

214 The occurrence of anemia was not the same among children who had diarrhea and no diarrhea.  
215 The odds of anemia among children who had diarrhea for the last two months before the date  
216 interview was almost two times higher than their counter parts. This finding contradicted with a  
217 study in University of Gondar specialized hospital (Northwest Ethiopia) [23]. This contradiction  
218 can be explained by the difference in the study participants. The current study was conducted  
219 among ambulatory patients while the study in University of Gondar specialized hospital was  
220 conducted among admitted pediatric patients. On the other hand, the University of Gondar hospital  
221 study considered acute diarrhea so that there might be a decrease in body fluid and mask the low

222 level of hemoglobin value. Whereas, chronic diarrhea may result in depletion of important  
223 nutrients including iron due to poor absorption in the gastro-intestinal tract. But diarrhea had no  
224 association with anemia among studies conducted in Gondar (Northwest Ethiopia) [17] and Tigray  
225 (Northern Ethiopia) [35].

226 As family monthly income increased, the prevalence of anemia decreased markedly similar to the  
227 findings in Tigray region (Northern Ethiopia) [36], Bedele Hospital (Southwest Ethiopia) [27],  
228 Gugufu Health Center (Northeast Ethiopia) [12] and Sudan [37]. The relationship between socio-  
229 economic status and malnutrition is well established. Low socio-economic status may result in  
230 food scarcity, poor hygiene and poor child care in general. This in turn may precipitate the  
231 occurrence of malnutrition including iron deficiency anemia.

232 The result of this study indicated that anemia is a major public health problem among children  
233 under-five years attending health institutions of Northeast Ethiopia. According to WHO  
234 classification for persistent anemia in a population (40%) and above, this finding confirmed that  
235 anemia among under-five children was a severe public health problem. Such a high magnitude of  
236 anemia among under-five children corroborates the finding of EDHS affirming the fact that despite  
237 the implementation of micro nutrient deficiency prevention and control guideline for several years.  
238 Endorsement and implementation of the national nutrition strategy and the greater emphasis given  
239 to anemia in the newly endorsed food and nutrition policy, there remains much to be done to cure  
240 the problem anemia. The findings call for galvanizing community level intervention that really  
241 addresses key behaviors such as breast feeding and dietary behaviors.

## 242 **Limitation of the study**

243 Anemia was measured based on only hemoglobin concentration parameter, inclusion of other  
244 measures such as serum ferritin could lead to better differentiation of cases. Being an institution-  
245 based study, the result cannot be extrapolated to the larger community. Moreover, the study was  
246 done only in one season and may not represent the magnitude for the year round.

## 247 **Conclusions**

248 The burden of anemia among children aged 6–59 months in the study site was high and it has  
249 severe public health problem according to the WHO cut-off points. Age of child, Age of mother,  
250 family monthly income, exclusive breast-feeding status, and having low dietary diversity score is  
251 significantly associated with anemia. The health care workers are advised to educate the pregnant,  
252 lactating mothers and the whole community about good dietary practice, the benefit of exclusive  
253 breast-feeding and income-generating activities by collaborating with the finance and economy  
254 development sectors. Researchers are recommended to use additional biomarkers to differentiate  
255 the cause of anemia and its seasonality using longitudinal designs.

## 256 **Acknowledgments**

257 We highly acknowledge study participants and data collectors for their keen cooperation in getting  
258 quality data.

## 259 **References**

- 260 1. World Health Organization (WHO). The global prevalence of anaemia in 2011. World  
261 Health Organization. Geneva: WHO; 2015.



- 262 2. Benoist B de, McLean E, Egli I, Cogswell M. Worldwide prevalence of anaemia: WHO  
263 Global Database on Anaemia, 1993-2005. WHO Glob Database Anaemia. 2009.  
264 doi:10.1017/S1368980008002401
- 265 3. Goddard WP, Murray I, Long RG, Scott B, Barton R, Salman M, et al. Iron deficiency  
266 anaemia. *Bmj*. 1997. p. 1759. doi:10.1136/bmj.314.7096.1759
- 267 4. McLean E, Cogswell M, Egli I, Wojdyla D, De Benoist B. Worldwide prevalence of  
268 anaemia, WHO Vitamin and Mineral Nutrition Information System, 1993-2005. *Public*  
269 *Health Nutr*. 2009;12: 444–454. doi:10.1017/S1368980008002401
- 270 5. Central Statistical Agency (CSA) [Ethiopia], ICF. Ethiopia Demographic and Health  
271 Survey 2016. Addis Ababa, Ethiopia; 2017.
- 272 6. Haas JD, Brownlie IV T. Iron deficiency and reduced work capacity: A critical review of  
273 the research to determine a causal relationship. *J Nutr*. 2001;131: 676–690.  
274 doi:10.1093/jn/131.2.676s
- 275 7. Lozoff B. Iron deficiency and child development. *Food Nutr Bull*. 2007;28: 560–571.  
276 doi:10.1177/15648265070284s409
- 277 8. Oppenheimer SJ. Iron-deficiency anemia: reexamining the nature and magnitude of the  
278 public health problem. *J Nutr*. 2001;131: 616–635.
- 279 9. Grantham-Mcgregor S, Baker-Henningham H. Iron deficiency in childhood: Causes and  
280 consequences for child development. *Ann Nestle*. 2010;68: 105–119.  
281 doi:10.1159/000319670
- 282 10. E. RB, Kliegman RM, Jenson HB. *Nelson Textbook of Pediatrics*. 17th ed. Judith  
283 Fletcher; 2004.
- 284 11. Harding KL, Aguayo VM, Namirembe G, Webb P. Determinants of anemia among

- 285 women and children in Nepal and Pakistan: An analysis of recent national survey data.  
286 *Matern Child Nutr.* 2018;14: 1–13. doi:10.1111/mcn.12478
- 287 12. Gebreweld A, Ali N, Ali R, Fisha T. Prevalence of anemia and its associated factors  
288 among children under five years of age attending at Gugufu health center, South Wollo,  
289 Northeast Ethiopia. *PLoS One.* 2019;14: 1–13. doi:10.1371/journal.pone.0218961
- 290 13. Reithinger R, Ngondi JM, Graves PM, Hwang J, Getachew A, Jima D. Risk factors for  
291 anemia in children under 6 years of age in Ethiopia : analysis of the data from the cross-  
292 sectional Malaria Indicator Survey , 2007. *Trans R Soc Trop Med Hyg.* 2013;107: 769–  
293 776. doi:10.1093/trstmh/trt096
- 294 14. Abdisa Boka and Dessalegn Nigatu. Prevalence of Anemia and Associated Factors  
295 Among Under Five Children in Bedele Hospital, Iluababora Zone, Oromia Regional State  
296 South West Ethiopia, 2017. *Int J Dev Res.* 2018;08: 24284–24290. Available:  
297 <http://www.journalijdr.com>
- 298 15. Gebereselassie Y, Birhanselassie M, Menjetta T, Alemu J, Tsegaye A. Magnitude ,  
299 Severity , and Associated Factors of Anemia among Under-Five Children Attending  
300 Hawassa University Teaching and Referral Hospital , Hawassa , Southern Ethiopia , 2016.  
301 Anemia. 2020;2020. doi:<https://doi.org/10.1155/2020/7580104>
- 302 16. Kuziga F, Adoke Y, Wanyenze RK. Prevalence and factors associated with anaemia  
303 among children aged 6 to 59 months in Namutumba district, Uganda: A cross- sectional  
304 study. *BMC Pediatr.* 2017;17: 1–9. doi:10.1186/s12887-017-0782-3
- 305 17. Melku M, Alene KA, Terefe B, Enawgaw B, Biadgo B, Abebe M, et al. Anemia severity  
306 among children aged 6-59 months in Gondar town, Ethiopia: A community-based cross-  
307 sectional study. *Ital J Pediatr.* 2018;44: 1–12. doi:10.1186/s13052-018-0547-0

- 308 18. Cornet M, Le Hesran JY, Fievet N, Cot M, Personne P, Gounoue R, et al. Prevalence of  
309 and risk factors for anemia in young children in southern Cameroon. *Am J Trop Med Hyg.*  
310 1998;58: 606–611. doi:10.4269/ajtmh.1998.58.606
- 311 19. Parbey PA, Tarkang E, Manu E, Amu H, Ayanore MA, Aku FY, et al. Risk Factors of  
312 Anaemia among Children under Five Years in the Hohoe Municipality, Ghana: A Case  
313 Control Study. *Anemia.* 2019;2019. doi:10.1155/2019/2139717
- 314 20. Gebreegziabher G, Etana B, Niggusie D. Determinants of Anemia among Children Aged  
315 6 – 59 Months Living in Kilde Awulaelo Woreda , Northern Ethiopia. *Anemia.* 2014;2014.  
316 doi:10.1155/2014/245870
- 317 21. Gebremeskel MG, Mulugeta A, Bekele A, Lemma L, Gebremichael M, Gebremedhin H,  
318 et al. Individual and community level factors associated with anemia among children 6 —  
319 59 months of age in Ethiopia : A further analysis of 2016 Ethiopia demographic and health  
320 survey. *PLoS One.* 2020;15: 1–17. doi:10.1371/journal.pone.0241720
- 321 22. Gebreegziabher T, Regassa N, Wakefield M, Pritchett K, Hawk S. Disparities in the  
322 prevalence and risk factors of anaemia among children aged 6–24 months and 25–59  
323 months in Ethiopia. *J Nutr Sci.* 2020;9. doi:10.1017/jns.2020.29
- 324 23. Enawgaw B, Workineh Y, Tadesse S, Mekuria E, Addisu A, Genetu M. Prevalence of  
325 anemia and associated factors among hospitalized children attending the University of  
326 Gondar Hospital , Northwest Ethiopia. *J Int Fed Clin Chem Lab Med.* 2019;30: 35–47.
- 327 24. Ali Salami, Ghassan Ghssein, Lamis Salloum HF. Prevalence of anemia among Lebanese  
328 hospitalized children. *PLOS.* 2018;13.
- 329 25. Malako BG, Asamoah BO, Tadesse M, Hussen R, Gebre MT. Stunting and anemia among  
330 children 6-23 months old in Damot Sore district, Southern Ethiopia. *BMC Nutr.* 2019;5:

- 331 1–11. doi:10.1186/s40795-018-0268-1
- 332 26. Ferreira R. Prevalence of anemia in under five-year-old children in a children ' s hospital  
333 in. 2010; 100–104. doi:10.5581/1516-8484.20110028
- 334 27. Abdisa Boka and Dessalegn Nigatu. Prevalence of anemia and association factors among  
335 under five children in Bedele hospital, ilubabur zone, oromia regional state south west  
336 ethiopia, 2017. IJDR. 2018;08: 24284–24290.
- 337 28. Kejo D, Petrucka P, Martin H, Kimanya M, Mosha T. Prevalence and predictors of  
338 anemia among children under 5 years of age in Arusha District, Tanzania. *Pediatr Heal*  
339 *Med Ther*. 2018;Volume 9: 9–15. doi:10.2147/phmt.s148515
- 340 29. Ewusie JE, Ahiadeke C, Beyene J, Hamid JS. Prevalence of anemia among under-5  
341 children in the Ghanaian population: Estimates from the Ghana demographic and health  
342 survey. *BMC Public Health*. 2014;14: 1–9. doi:10.1186/1471-2458-14-626
- 343 30. Gari T, Loha E, Deressa W, Solomon T, Atsbeha H, Assegid M, et al. Anaemia among  
344 children in a drought affected community in south-central Ethiopia. *PLoS One*. 2017;12:  
345 1–16. doi:10.1371/journal.pone.0170898
- 346 31. Li H, Xiao J, Liao M, Huang G, Zheng J, Wang H, et al. Anemia prevalence , severity and  
347 associated factors among children aged 6 – 71 months in rural Hunan Province , China : a  
348 community-based cross-sectional study. *BMC Public Health*. 2020;20: 989.  
349 doi:<https://doi.org/10.1186/s12889-020-09129-y>
- 350 32. WHO/UNICEF. Global Nutrition Target 2025: Breastfeeding Policy Brief  
351 (WHO/NMH/NHD/14.7). Geneva: WHO; 2014. p. 8.
- 352 33. Parbey PA, Tarkang E, Manu E, Amu H, Ayanore MA, Aku FY, et al. Risk Factors of  
353 Anaemia among Children under Five Years in the Hohoe Municipality , Ghana : A Case

- 354 Control Study. 2019;2019. doi:10.1155/2019/2139717
- 355 34. Engidaye G, Melku M, Yalew A, Getaneh Z, Asrie F. Under nutrition , maternal anemia  
356 and household food insecurity are risk factors of anemia among preschool aged children in  
357 Menz Gera Midir district , Eastern Amhara , Ethiopia : a community based cross-sectional  
358 study. BMC Public Health. 2019;19: 968. doi:<https://doi.org/10.1186/s12889-019-7293-0>
- 359 35. Wasihun AG, Teferi M, Negash L, Marugán J, Yemane D, McGuigan KG, et al. Intestinal  
360 parasitosis, anaemia and risk factors among pre-school children in Tigray region, northern  
361 Ethiopia. BMC Infect Dis. 2020;20: 1–11. doi:10.1186/s12879-020-05101-8
- 362 36. Araya Gebreyesus Wasihun\*1, Mekonen Teferi2, Letemichal Negash1, Javier Marugán3,  
363 Dejen Yemane4, Kevin G. McGuigan5, Ronan M. Conroy6, Haftu Temesgen Abebe 7  
364 TAD. Intestinal parasitosis , anaemia and risk factors among pre-school children  
365 Affiliations : 2019; 1–29.
- 366 37. Elmardi KA, Adam I, Malik EM, Ibrahim AA, Elhassan AH, Kafy HT, et al. Anaemia  
367 prevalence and determinants in under 5 years children: findings of a cross-sectional  
368 population-based study in Sudan. BMC Pediatr. 2020;20: 1–14. doi:10.1186/s12887-020-  
369 02434-w

## 370 **Supporting information**

### 371 **S1 File. Ethical approval**

372 (PDF)

### 373 **S2 File. STROBE checklist**

374 (DOCX)

### 375 **S1 Dataset. Anemia and associated factors among children aged 6-59 months.**

376 (SAV)

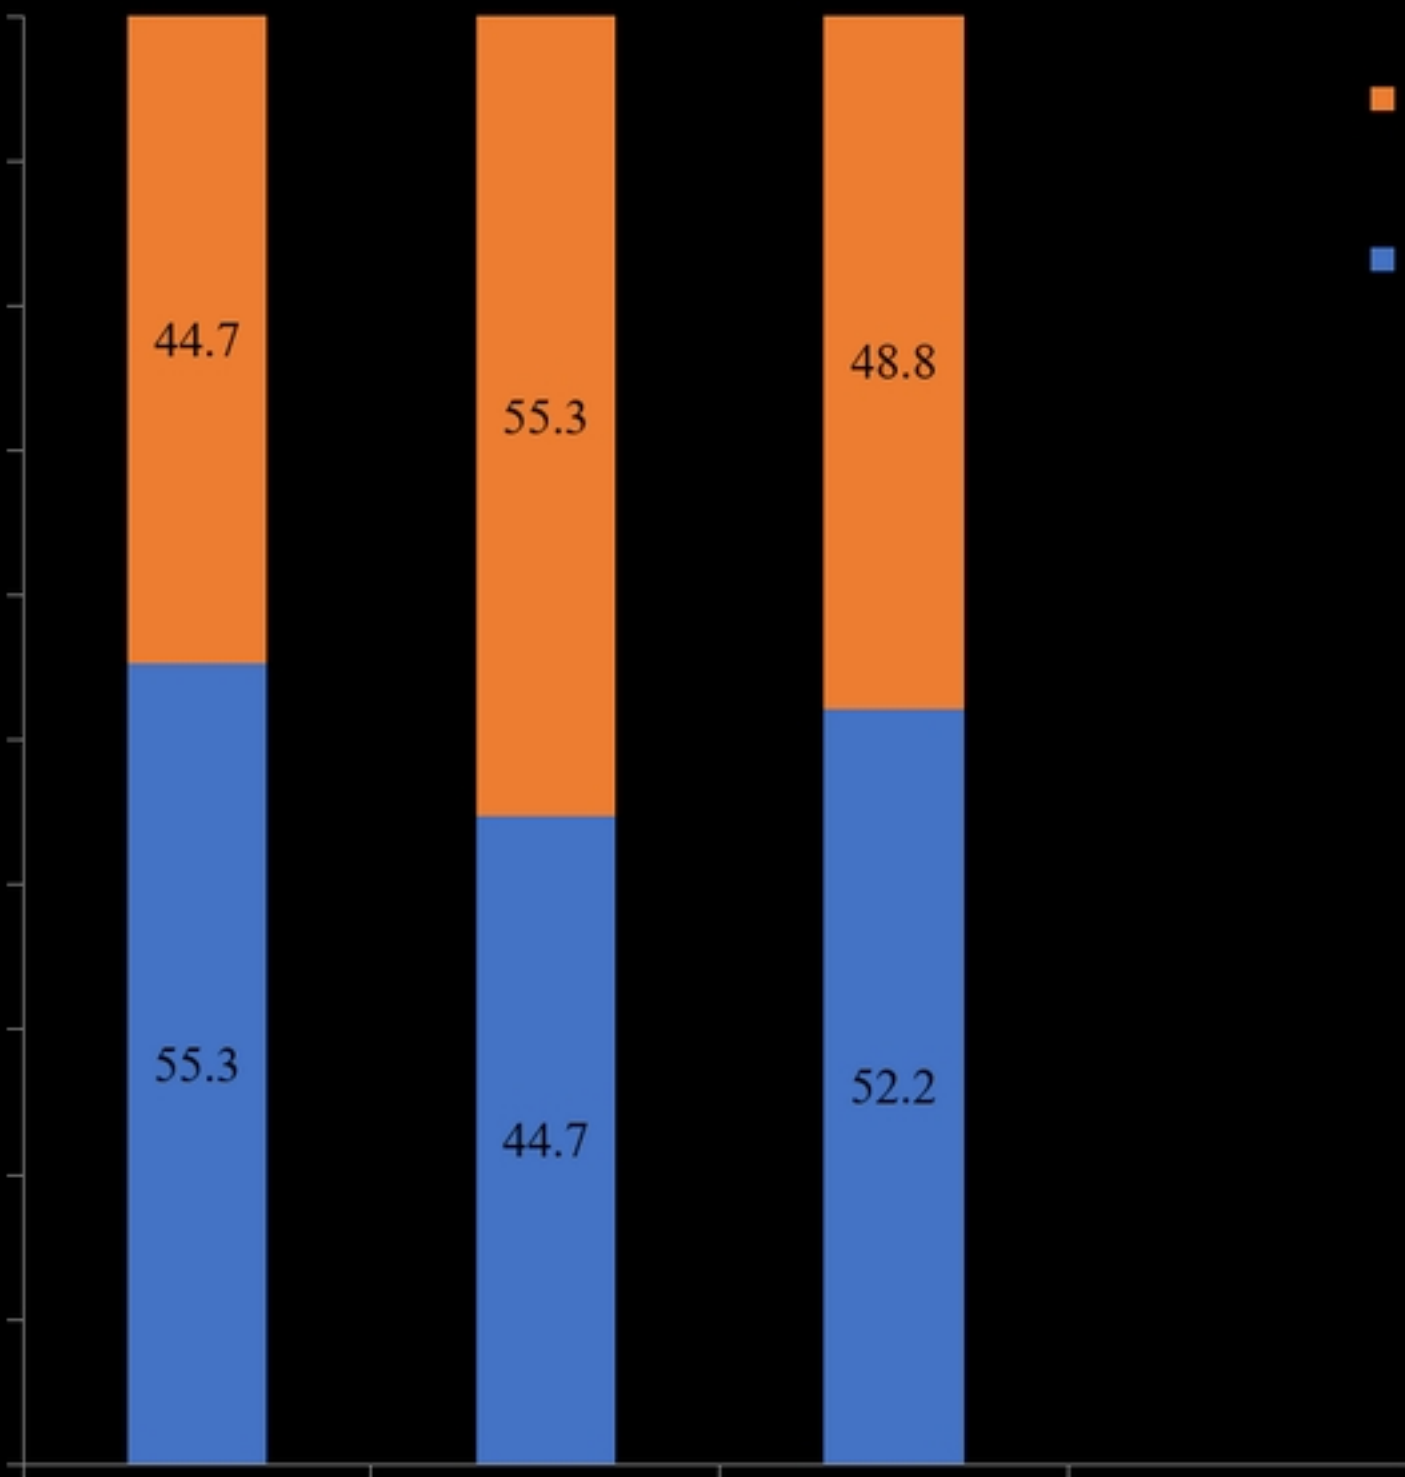

Figure
